# Supplementary material
Source: ML conference proceedings conference paper supplement (https://proceedings.mlr.press/v33/oliva14b.html)
Supplement: Supplementary file [file oliva14b-supp.pdf]

## Supplemental Materials

### Lemmata

**Lemma 1** Let  $X$  be a non-negative r.v. and  $\mathcal{C}$  be an measurable event, then  $\mathbb{E}[X|\mathcal{C}]\mathbb{P}(\mathcal{C}) \leq \mathbb{E}[X]$ .

*Proof.*

$$\mathbb{E}[X] = \mathbb{E}[X|\mathcal{C}]\mathbb{P}(\mathcal{C}) + \mathbb{E}[X|\mathcal{C}^c]\mathbb{P}(\mathcal{C}^c) \geq \mathbb{E}[X|\mathcal{C}]\mathbb{P}(\mathcal{C})$$

□

**Lemma 2:**  $\frac{1}{n} \sum_{k=1}^n \varphi_m(k/n) \varphi_l(k/n) = \mathbb{I}\{l = m\}$ , for  $1 \leq l, m \leq n - 1$ .

*Proof.* See Lemma 1.7 in [11].

**Lemma 3:** Let  $H_j$  be the  $N \times M_n$  matrix with entries  $H_j(i, m) = \eta_{jm}^{(i)} = \frac{1}{n} \vec{\varphi}_m^T \xi_j^{(i)}$ , then its rows  $H_j^{(i)} \stackrel{iid}{\sim} \mathcal{N}(0, \frac{\sigma_\xi^2}{n} I)$ .

*Proof.*  $H_j^{(i)} = \frac{1}{n} [\vec{\varphi}_1 \dots \vec{\varphi}_{M_n}]^T \xi_j^{(i)}$ , hence it is clearly Gaussian with mean 0. Furthermore,

$$\begin{aligned} \mathbb{E}[H_{jl}^{(i)} H_{jm}^{(i)}] &= \mathbb{E}[(\frac{1}{n} \vec{\varphi}_l^T \xi_j^{(i)}) (\frac{1}{n} \vec{\varphi}_m^T \xi_j^{(i)})] \\ &= \frac{1}{n} \vec{\varphi}_l^T \mathbb{E}[(\xi_j^{(i)}) (\xi_j^{(i)})^T] \frac{1}{n} \vec{\varphi}_m \\ &= \frac{1}{n^2} \vec{\varphi}_l^T (\sigma_\xi^2 I) \vec{\varphi}_m \\ &= \frac{\sigma_\xi^2}{n} (\frac{1}{n} \vec{\varphi}_l^T \vec{\varphi}_m) \\ &= \frac{\sigma_\xi^2}{n} \mathbb{I}\{l = m\}, \end{aligned}$$

where the last line follows from Lemma 2. Furthermore,  $H_S^{(i)} \stackrel{iid}{\sim} \mathcal{N}(0, \frac{\sigma_\xi^2}{n} I)$  directly follows using Lemma 3 and the fact that  $\xi_j^{(i)}$  are independent over  $j$  as well as  $i$  indices. □

**Lemma 4**  $\mathbb{P}(\|H\|_{\max} \geq n^a) \leq 2\sigma_\xi p M_n n^{a-1/2} e^{-\frac{n^{1-2a}}{2\sigma_\xi^2}}$

*Proof.*

$$\begin{aligned} \mathbb{P}(\|H\|_{\max} \geq n^a) &\leq \mathbb{P}\left(\cup_{ij} \{|H_{Sj}^{(i)}| \geq n^a\}\right) \\ &\leq \sum_{ij} \mathbb{P}\left(|H_j^{(i)}| \geq n^a\right) \\ &= p M_n \mathbb{P}\left(\frac{\sigma_\xi}{\sqrt{n}} |Z| \geq n^a\right) \\ &\leq 2\sigma_\xi p M_n n^{a-1/2} e^{-\frac{n^{1-2a}}{2\sigma_\xi^2}}, \end{aligned}$$

□

where  $Z \sim \mathcal{N}(0, 1)$ , and the last line follows from a Gaussian Tail inequality.

**Lemma 5**  $\|E_j\|_{\max} \leq C_Q n^{-\gamma+1/2}$ , where  $C_Q \in (0, \infty)$  is a constant depending on  $Q$ .

*Proof.* See Lemma 1.8 in [11].

**Lemma 6**  $\|\beta_S^*\|_2^2 \leq Qs$ .

*Proof.*

$$\begin{aligned} \|\beta_S^*\|_2^2 &= \sum_{j \in S} \|\beta_j^*\|_2^2 = \sum_{j \in S} \sum_{m=1}^{M_n} \beta_{jm}^{*2} \leq \sum_{j \in S} \sum_{m=1}^{M_n} c_k^2 \beta_{jm}^{*2} \\ &\leq Qs \end{aligned}$$

□

**Lemma 7:**  $\exists N_0, n_0, \tilde{C}_{\min}, \tilde{C}_{\max}, 0 < \tilde{C}_{\min} \leq \tilde{C}_{\max} < \infty, 0 < \tilde{\delta} \leq 1$  s.t. if  $\|H\|_{\max} < n^{-a}$ , and  $N > N_0, n > n_0$  then

$$\Lambda_{\max}\left(\frac{1}{N} \tilde{A}_S^T \tilde{A}_S\right) \leq \tilde{C}_{\max} < \infty \quad (34)$$

$$\Lambda_{\min}\left(\frac{1}{N} \tilde{A}_S^T \tilde{A}_S\right) \geq \tilde{C}_{\min} > 0 \quad (35)$$

$$\forall j \in S^c, \left\| \left(\frac{1}{N} \tilde{A}_j^T \tilde{A}_S\right) \left(\frac{1}{N} \tilde{A}_S^T \tilde{A}_S\right)^{-1} \right\|_2 \leq \frac{1 - \tilde{\delta}}{\sqrt{s}} \quad (36)$$

*Proof.* First, note that by the Courant-Fischer-Weyl min-max principle (e.g. [1]), for symmetric real matrices  $B, C$  we have that:

$$\begin{aligned} \Lambda_{\max}(B + C) &= \max_{\|x\|=1} x^T (B + C)x \\ &= \max_{\|x\|=1} x^T Bx + x^T Cx \\ &\leq \max_{\|x\|=1} x^T Bx + \max_{\|x\|=1} x^T Cx \\ &= \Lambda_{\max}(B) + \Lambda_{\max}(C) \end{aligned}$$

and,

$$\begin{aligned} \Lambda_{\min}(B + C) &= \min_{\|x\|=1} x^T (B + C)x \\ &= \min_{\|x\|=1} x^T Bx + x^T Cx \\ &\geq \min_{\|x\|=1} x^T Bx + \min_{\|x\|=1} x^T Cx \\ &= \Lambda_{\min}(B) + \Lambda_{\min}(C). \end{aligned}$$

Thus,

$$\begin{aligned} \Lambda_{\max}\left(\frac{1}{N} \tilde{A}_S^T \tilde{A}_S\right) &\leq \Lambda_{\max}\left(\frac{1}{N} A_S^T A_S\right) \quad (37) \\ &+ \Lambda_{\max}\left(\frac{1}{N} ((E_S + H_S)^T A_S + A_S^T (E_S + H_S))\right) \quad (38) \\ &+ \Lambda_{\max}\left(\frac{1}{N} (E_S + H_S)^T (E_S + H_S)\right). \quad (39) \end{aligned}$$

Since the term in (37) is bounded by (16), we need only show that (38) and (39) are bounded for large enough  $N, n$ . Similarly, we have that:

$$\begin{aligned} & \Lambda_{\min} \left( \frac{1}{N} \tilde{A}_S^T \tilde{A}_S \right) \\ & \geq \Lambda_{\min} \left( \frac{1}{N} A_S^T A_S \right) \end{aligned} \quad (40)$$

$$+ \Lambda_{\min} \left( \frac{1}{N} ((E_S + H_S)^T A_S + A_S^T (E_S + H_S)) \right) \quad (41)$$

$$+ \Lambda_{\min} \left( \frac{1}{N} (E_S + H_S)^T (E_S + H_S) \right). \quad (42)$$

Since the term in (40) is bounded by (17) and (42) is a positive semi-definite matrices, it suffices to show that

$$\Lambda_{\min} \left( \frac{1}{N} ((E_S + H_S)^T A_S + A_S^T (E_S + H_S)) \right) > -C_{\min}$$

for large enough  $N, n$ . Note further, that for symmetric matrix  $B$ :

$$\Lambda_{\max}(B) \leq \max_{\|x\|=1} |x^T B x| \text{ and}$$

$$\Lambda_{\min}(B) \geq - \max_{\|x\|=1} |x^T B x|.$$

Hence we will use the maximum absolute Rayleigh quotient ( $x^T B x$ ) control bounds on the expected eigenvalues. Note that:

$$\begin{aligned} & \max_{\|x\|=1} |x^T ((E_S + H_S)^T A_S + A_S^T (E_S + H_S)) x| \leq \\ & \max_{\|x\|=1} |((E_S + H_S)x)^T (A_S x)| + |(A_S x)^T ((E_S + H_S)x)| \\ & = 2 \max_{\|x\|=1} |((E_S + H_S)x)^T (A_S x)| \\ & \leq 2 \max_{\|x\|=1} \|(E_S + H_S)x\|_2 \|A_S x\|_2 \\ & \leq 2 \left( \max_{\|x\|=1} \|A_S x\|_2 \right) \left( \max_{\|x\|=1} \|(E_S + H_S)x\|_2 \right) \\ & \leq 2 \left( \Lambda_{\max}(A_S^T A_S) \right)^{\frac{1}{2}} \left( \sqrt{N} \max_{\|x\|=1} \|(E_S + H_S)x\|_{\infty} \right) \\ & \leq 2\sqrt{N C_{\max}} \left( \sqrt{N} \max_{\|x\|=1, i} |(E_S^{(i)} + H_S^{(i)})^T x| \right) \\ & \leq 2N\sqrt{C_{\max}} \left( \max_{\|x\|=1, i} \|E_S^{(i)} + H_S^{(i)}\|_2 \|x\|_2 \right) \\ & \leq 2N\sqrt{C_{\max}} \sqrt{s M_n} (C_Q n^{-\gamma+1/2} + n^{-a}). \end{aligned}$$

Similarly,

$$\begin{aligned} & \max_{\|x\|=1} |x^T (E_S + H_S)^T (E_S + H_S) x| \leq \\ & s M_n N (C_Q n^{-\gamma+1/2} + n^{-a})^2. \end{aligned}$$

Thus,

$$\begin{aligned} \Lambda_{\max} \left( \frac{1}{N} \tilde{A}_S^T \tilde{A}_S \right) & \leq C_{\max} \\ & + 2\sqrt{C_{\max} s M_n} (C_Q n^{-\gamma+1/2} + n^{-a}) \\ & + s M_n (C_Q n^{-\gamma+1/2} + n^{-a})^2 \end{aligned}$$

$$\leq \tilde{C}_{\max},$$

and

$$\begin{aligned} \Lambda_{\min} \left( \frac{1}{N} \tilde{A}_S^T \tilde{A}_S \right) & \geq C_{\min} \\ & - 2\sqrt{C_{\max} s M_n} (C_Q n^{-\gamma+1/2} + n^{-a}) \\ & \geq \tilde{C}_{\min}, \end{aligned}$$

for large enough  $n, N$  and appropriate  $\tilde{C}_{\max}, \tilde{C}_{\min}$  using our assumptions. Let  $\|\cdot\| = \|\cdot\|_2$  below. Hence,

$$\begin{aligned} & \left\| \left( \frac{1}{N} \tilde{A}_j^T \tilde{A}_S \right) \left( \frac{1}{N} \tilde{A}_S^T \tilde{A}_S \right)^{-1} \right\| \\ & = \left\| \left( \frac{1}{N} \tilde{A}_j^T \tilde{A}_S \right) \left( \frac{1}{N} A_S^T A_S \right)^{-1} \left( \frac{1}{N} A_S^T A_S \right) \left( \frac{1}{N} \tilde{A}_S^T \tilde{A}_S \right)^{-1} \right\| \\ & \leq \left\| \left( \frac{1}{N} \tilde{A}_j^T \tilde{A}_S \right) \left( \frac{1}{N} A_S^T A_S \right)^{-1} \right\| \left\| \left( \frac{1}{N} A_S^T A_S \right) \left( \frac{1}{N} \tilde{A}_S^T \tilde{A}_S \right)^{-1} \right\|. \end{aligned}$$

Also,

$$\begin{aligned} & \left\| \left( \frac{1}{N} \tilde{A}_j^T \tilde{A}_S \right) \left( \frac{1}{N} A_S^T A_S \right)^{-1} \right\| \\ & = \left\| \frac{1}{N} (A_j + E_j + H_j)^T (A_S + E_S + H_S) \left( \frac{1}{N} A_S^T A_S \right)^{-1} \right\| \\ & \leq \left\| \frac{1}{N} A_j^T A_S \left( \frac{1}{N} A_S^T A_S \right)^{-1} \right\| \\ & + \left\| \frac{1}{N} A_j^T (E_S + H_S) \left( \frac{1}{N} A_S^T A_S \right)^{-1} \right\| \\ & + \left\| \frac{1}{N} (E_j + H_j)^T A_S \left( \frac{1}{N} A_S^T A_S \right)^{-1} \right\| \\ & + \left\| \frac{1}{N} (E_j + H_j)^T (E_S + H_S) \left( \frac{1}{N} A_S^T A_S \right)^{-1} \right\| \\ & \leq \frac{1-\delta}{\sqrt{s}} + \left\| \frac{1}{\sqrt{N}} A_j^T \right\| \left\| \frac{1}{\sqrt{N}} (E_S + H_S) \right\| \left\| \left( \frac{1}{N} A_S^T A_S \right)^{-1} \right\| \\ & + \left\| \frac{1}{\sqrt{N}} (E_j + H_j) \right\| \left\| \frac{1}{\sqrt{N}} A_S \right\| \left\| \left( \frac{1}{N} A_S^T A_S \right)^{-1} \right\| \\ & + \left\| \frac{1}{N} (E_j + H_j)^T (E_S + H_S) \right\| \left\| \left( \frac{1}{N} A_S^T A_S \right)^{-1} \right\| \\ & \leq \frac{1-\delta}{\sqrt{s}} + \frac{\sqrt{C_{\max}}}{C_{\min}} \sqrt{s M_n} (C_Q n^{-\gamma+1/2} + n^{-a}) \quad (43) \end{aligned}$$

$$+ \frac{\sqrt{C_{\max}}}{C_{\min}} \sqrt{M_n} (C_Q n^{-\gamma+1/2} + n^{-a}) \quad (44)$$

$$+ \frac{1}{C_{\min}} \sqrt{s M_n} (C_Q n^{-\gamma+1/2} + n^{-a})^2. \quad (45)$$

Also,

$$\begin{aligned} & \frac{1}{N} A_S^T A_S \\ & = \frac{1}{N} \tilde{A}_S^T \tilde{A}_S - \frac{1}{N} A_S^T (E_S + H_S) \\ & - \frac{1}{N} (E_S + H_S)^T A_S - \frac{1}{N} (E_S + H_S)^T (E_S + H_S). \end{aligned}$$

Thus,

$$\begin{aligned} & \left\| \left( \frac{1}{N} A_S^T A_S \right) \left( \frac{1}{N} \tilde{A}_S^T \tilde{A}_S \right)^{-1} \right\| \\ & \leq 1 + \left\| \frac{1}{N} A_S^T (E_S + H_S) \left( \frac{1}{N} \tilde{A}_S^T \tilde{A}_S \right)^{-1} \right\| \\ & + \left\| \frac{1}{N} (E_S + H_S)^T A_S \left( \frac{1}{N} \tilde{A}_S^T \tilde{A}_S \right)^{-1} \right\| \\ & + \left\| \frac{1}{N} (E_S + H_S)^T (E_S + H_S) \left( \frac{1}{N} \tilde{A}_S^T \tilde{A}_S \right)^{-1} \right\| \end{aligned}$$

$$\leq 1 + \frac{\sqrt{C_{\max}}}{C_{\min}} \sqrt{sM_n}(C_Q n^{-\gamma+1/2} + n^{-a}) \quad (46)$$

$$+ \frac{\sqrt{C_{\max}}}{C_{\min}} \sqrt{sM_n}(C_Q n^{-\gamma+1/2} + n^{-a}) \quad (47)$$

$$+ \frac{1}{C_{\min}} sM_n(C_Q n^{-\gamma+1/2} + n^{-a})^2. \quad (48)$$

By our assumptions all terms in (43)-(48), except  $\frac{1-\delta}{\sqrt{s}}$ , are going to zero. Hence, keeping leading terms, one may see that

$$\begin{aligned} & \left\| \left( \frac{1}{N} \tilde{A}_j^T \tilde{A}_S \right) \left( \frac{1}{N} \tilde{A}_S^T \tilde{A}_S \right)^{-1} \right\| \\ & \leq \frac{1-\delta}{\sqrt{s}} + O\left(\sqrt{sM_n}(n^{-\gamma+1/2} + n^{-a})\right) \\ & \quad + O\left(\sqrt{s}M_n(n^{-\gamma+1/2} + n^{-a})^2\right) \\ & \leq \frac{1-\tilde{\delta}}{\sqrt{s}} \end{aligned}$$

for large enough  $n$  and appropriate  $\tilde{\delta}$ .  $\square$

$$\begin{aligned} \text{Lemma 8} \quad & \mathbb{E} \left[ \left\| \tilde{\Sigma}_{SS}^{-1} \left( \frac{1}{N} \tilde{A}_S^T \right) V \right\|_{\infty} \middle| \mathcal{B} \right] \mathbb{P}(\mathcal{B}) = \\ & O\left(\frac{s^{3/2}}{M_n^{2\gamma-1/2}}\right). \end{aligned}$$

*Proof.* First note that:

$$\left\| \tilde{\Sigma}_{SS}^{-1} \left( \frac{1}{N} \tilde{A}_S^T \right) V \right\|_{\infty} \leq \left\| \tilde{\Sigma}_{SS}^{-1} \right\|_{\infty} \left\| \left( \frac{1}{N} \tilde{A}_S^T \right) \right\|_{\infty} \|V\|_{\infty}.$$

We have that

$$\begin{aligned} |V_i| &= \left| \sum_{j \in S} \sum_{m=M_n+1}^{\infty} \alpha_{jm}^{(i)} \beta_{jm}^* \right| \leq \sum_{j \in S} \sum_{m=M_n+1}^{\infty} \left| \alpha_{jm}^{(i)} \beta_{jm}^* \right| \\ &\leq \sum_{j \in S} \left( \sum_{m=M_n+1}^{\infty} \alpha_{jm}^{(i)2} \right)^{\frac{1}{2}} \left( \sum_{m=M_n+1}^{\infty} \beta_{jm}^{*2} \right)^{\frac{1}{2}}, \end{aligned}$$

and

$$\begin{aligned} & \frac{1}{M_n^{2\gamma}} \left( \sum_{m=M_n+1}^{\infty} M_n^{2\gamma} \alpha_{jm}^{(i)2} \right)^{\frac{1}{2}} \left( \sum_{m=M_n+1}^{\infty} M_n^{2\gamma} \beta_{jm}^{*2} \right)^{\frac{1}{2}} \\ & \leq \frac{1}{M_n^{2\gamma}} \left( \sum_{m=1}^{\infty} c_k^2 \alpha_{jm}^{(i)2} \right)^{\frac{1}{2}} \left( \sum_{m=1}^{\infty} c_k^2 \beta_{jm}^{*2} \right)^{\frac{1}{2}} \\ & \leq \frac{Q}{M_n^{2\gamma}}. \end{aligned}$$

Thus  $|V_i| \leq \frac{Qs}{M_n^{2\gamma}}$ . Also,

$$\begin{aligned} \left\| \left( \frac{1}{N} \tilde{A}_S^T \right) \right\|_{\infty} &\leq \frac{1}{N} (\|A_S^T\|_{\infty} + \|E_S^T\|_{\infty} + \|H_S^T\|_{\infty}) \\ &\leq Q + C_Q n^{-\gamma+1/2} + n^{-a}. \end{aligned}$$

Hence,

$$\begin{aligned} & \mathbb{E} \left[ \left\| \tilde{\Sigma}_{SS}^{-1} \left( \frac{1}{N} \tilde{A}_S^T \right) V \right\|_{\infty} \middle| \mathcal{B} \right] \\ & \leq \frac{\sqrt{sM_n}}{\tilde{C}_{\min}} \left( Q + C_Q n^{-\gamma+1/2} + n^{-a} \right) \frac{Qs}{M_n^{2\gamma}}. \quad (49) \end{aligned}$$

$\square$

$$\begin{aligned} \text{Lemma 9} \quad & \mathbb{E} \left[ \left\| \tilde{\Sigma}_{SS}^{-1} \left( \frac{1}{N} \tilde{A}_S^T \right) \epsilon \right\|_{\infty} \middle| \mathcal{B} \right] \mathbb{P}(\mathcal{B}) = \\ & O\left(\sqrt{\log(sM_n)/N}\right). \end{aligned}$$

*Proof.* Note that given  $H_S$ ,  $Z = \tilde{\Sigma}_{SS}^{-1} \left( \frac{1}{N} \tilde{A}_S^T \right) \epsilon$  is normal with mean 0 and co-variance matrix:

$$\begin{aligned} & \mathbb{E} \left[ \tilde{\Sigma}_{SS}^{-1} \left( \frac{1}{N} \tilde{A}_S^T \right) \epsilon \epsilon^T \left( \frac{1}{N} \tilde{A}_S \right) \tilde{\Sigma}_{SS}^{-1} H_S \right] \\ & = \tilde{\Sigma}_{SS}^{-1} \left( \frac{1}{N} \tilde{A}_S^T \right) (\sigma_{\epsilon}^2 I) \left( \frac{1}{N} \tilde{A}_S \right) \tilde{\Sigma}_{SS}^{-1} \\ & = \frac{\sigma_{\epsilon}^2}{N} \tilde{\Sigma}_{SS}^{-1} \left( \frac{1}{N} \tilde{A}_S^T \tilde{A}_S \right) \tilde{\Sigma}_{SS}^{-1} \\ & = \frac{\sigma_{\epsilon}^2}{N} \tilde{\Sigma}_{SS}^{-1}. \end{aligned}$$

Hence, given  $H_S$  and  $\mathcal{B}$

$$\begin{aligned} \max_i \text{Var}[Z_i] &= \max_i \frac{\sigma_{\epsilon}^2}{N} e_i^T \tilde{\Sigma}_{SS}^{-1} e_i \leq \frac{\sigma_{\epsilon}^2}{N} \left( \Lambda_{\min}(\tilde{\Sigma}_{SS}) \right)^{-1} \\ &\leq \frac{\sigma_{\epsilon}^2}{N} \tilde{C}_{\min}^{-1}. \end{aligned}$$

And so [4],

$$\begin{aligned} & \mathbb{E} \left[ \|Z\|_{\infty} \middle| \mathcal{B} \right] \\ & = \mathbb{E} \left[ \mathbb{E} \left[ \|Z\|_{\infty} \middle| \mathcal{B}, H_S \right] \middle| \mathcal{B} \right] \\ & \leq \mathbb{E} \left[ \mathbb{E} \left[ 3\sqrt{\log(sM_n)} \|\text{Var}[Z]\|_{\infty} \middle| \mathcal{B}, H_S \right] \middle| \mathcal{B} \right] \\ & \leq \mathbb{E} \left[ 3\sigma_{\epsilon} \sqrt{\frac{\log(sM_n)}{N\tilde{C}_{\min}}} \middle| \mathcal{B} \right] \\ & = 3\sigma_{\epsilon} \sqrt{\frac{\log(sM_n)}{N\tilde{C}_{\min}}}. \end{aligned}$$

$\square$

$$\text{Lemma 10} \quad \mathbb{P} \left( \max_{j \in S^c} \|\mu_j^H\|_2 \geq 1 - \frac{\tilde{\delta}}{2} \right) \rightarrow 0$$

*Proof.*

$$\begin{aligned} & \mathbb{P} \left( \max_{j \in S^c} \|\mu_j^H\|_2 \geq 1 - \frac{\tilde{\delta}}{2} \right) \\ & = \mathbb{P} \left( \max_{j \in S^c} \|\mu_j^H\|_2 - (1 - \tilde{\delta}) \geq \frac{\tilde{\delta}}{2} \right) \end{aligned}$$

$$\begin{aligned} &\leq \mathbb{P} \left( \max_{j \in S^c} \|\mu_j^H\|_2 - (1 - \tilde{\delta}) \geq \frac{\tilde{\delta}}{2} \middle| \mathcal{B} \right) \mathbb{P}(\mathcal{B}) + \mathbb{P}(\mathcal{B}^c) \\ &\leq \frac{2}{\tilde{\delta}} \mathbb{E} \left[ \max_{j \in S^c} \|\mu_j^H\|_2 - (1 - \tilde{\delta}) \middle| \mathcal{B} \right] \mathbb{P}(\mathcal{B}) + \mathbb{P}(\mathcal{B}^c), \end{aligned}$$

Recall that

$$\begin{aligned} \hat{u}_j &= \frac{1}{\lambda_N} \tilde{\Sigma}_{jS} \tilde{\Sigma}_{SS}^{-1} \left( \frac{1}{N} \tilde{A}_S^T (E_S + H_S) \beta_S^* - \frac{1}{N} \tilde{A}_S^T V \right. \\ &\quad \left. - \frac{1}{N} \tilde{A}_S^T \epsilon + \lambda_N \hat{u}_S \right) - \frac{1}{\lambda_N N} \tilde{A}_j^T (E_S + H_S) \beta_S^* \\ &\quad + \frac{1}{\lambda_N N} \tilde{A}_j^T (V + \epsilon), \end{aligned}$$

where  $\tilde{\Sigma}_{jS} = \frac{1}{N} \tilde{A}_j^T \tilde{A}_S$ . Let  $\mu_j^H \equiv \mathbb{E} [\hat{u}_j | H] =$

$$\begin{aligned} &\tilde{\Sigma}_{jS} \tilde{\Sigma}_{SS}^{-1} \left( \frac{1}{\lambda_N N} \tilde{A}_S^T (E_S + H_S) \beta_S^* - \frac{1}{\lambda_N N} \tilde{A}_S^T V + \hat{u}_S \right) \\ &\quad - \frac{1}{\lambda_N N} \tilde{A}_j^T (E_S + H_S) \beta_S^* + \frac{1}{\lambda_N N} \tilde{A}_j^T V. \end{aligned}$$

Note that

$$\begin{aligned} \|\mu_j^H\|_2 &\leq \|\tilde{\Sigma}_{jS} \tilde{\Sigma}_{SS}^{-1}\|_2 \left( \left\| \frac{1}{\lambda_N N} \tilde{A}_S^T (E_S + H_S) \beta_S^* \right\|_2 \right. \\ &\quad \left. + \left\| \frac{1}{\lambda_N N} \tilde{A}_S^T V \right\|_2 + \|\hat{u}_S\|_2 \right) \\ &\quad + \left\| \frac{1}{\lambda_N N} \tilde{A}_j^T (E_S + H_S) \beta_S^* \right\|_2 + \left\| \frac{1}{\lambda_N N} \tilde{A}_j^T V \right\|_2. \end{aligned}$$

Given  $\mathcal{B}$ ,

$$\begin{aligned} \|\mu_j^H\|_2 &\leq \frac{1 - \tilde{\delta}}{\sqrt{s}} \left( \left\| \frac{1}{\lambda_N N} \tilde{A}_S^T (E_S + H_S) \beta_S^* \right\|_2 \right. \\ &\quad \left. + \left\| \frac{1}{\lambda_N N} \tilde{A}_S^T V \right\|_2 + \sqrt{s} \right) \\ &\quad + \left\| \frac{1}{\lambda_N N} \tilde{A}_j^T (E_S + H_S) \beta_S^* \right\|_2 + \left\| \frac{1}{\lambda_N N} \tilde{A}_j^T V \right\|_2 \\ &= 1 - \tilde{\delta} + \frac{1 - \tilde{\delta}}{\sqrt{s}} \left\| \frac{1}{\lambda_N N} \tilde{A}_S^T (E_S + H_S) \beta_S^* \right\|_2 \\ &\quad + \frac{1 - \tilde{\delta}}{\sqrt{s}} \left\| \frac{1}{\lambda_N N} \tilde{A}_S^T V \right\|_2 \\ &\quad + \left\| \frac{1}{\lambda_N N} \tilde{A}_j^T (E_S + H_S) \beta_S^* \right\|_2 + \left\| \frac{1}{\lambda_N N} \tilde{A}_j^T V \right\|_2 \end{aligned}$$

and so:

$$\begin{aligned} &\mathbb{E} \left[ \max_{j \in S^c} \|\mu_j^H\|_2 - (1 - \tilde{\delta}) \middle| \mathcal{B} \right] \mathbb{P}(\mathcal{B}) \\ &\leq \frac{1 - \tilde{\delta}}{\sqrt{s}} \mathbb{E} \left[ \left\| \frac{1}{\lambda_N N} \tilde{A}_S^T (E_S + H_S) \beta_S^* \right\|_2 \middle| \mathcal{B} \right] \mathbb{P}(\mathcal{B}) \\ &\quad + \frac{1 - \tilde{\delta}}{\sqrt{s}} \mathbb{E} \left[ \left\| \frac{1}{\lambda_N N} \tilde{A}_S^T V \right\|_2 \middle| \mathcal{B} \right] \mathbb{P}(\mathcal{B}) \\ &\quad + \mathbb{E} \left[ \max_{j \in S^c} \left\| \frac{1}{\lambda_N N} \tilde{A}_j^T (E_S + H_S) \beta_S^* \right\|_2 \middle| \mathcal{B} \right] \mathbb{P}(\mathcal{B}) \\ &\quad + \mathbb{E} \left[ \max_{j \in S^c} \left\| \frac{1}{\lambda_N N} \tilde{A}_j^T V \right\|_2 \middle| \mathcal{B} \right] \mathbb{P}(\mathcal{B}). \end{aligned}$$

First, note that

$$\begin{aligned} &\mathbb{E} \left[ \left\| \frac{1}{\lambda_N N} \tilde{A}_S^T (E_S + H_S) \beta_S^* \right\|_2 \right] \mathbb{P}(\mathcal{B}) \\ &\leq \frac{1}{\lambda_N \sqrt{N}} \mathbb{E} \left[ \left\| \frac{1}{\sqrt{N}} \tilde{A}_S^T \right\|_2 \|(E_S + H_S) \beta_S^*\|_2 \right] \mathbb{P}(\mathcal{B}) \end{aligned}$$

$$\begin{aligned} &\leq \frac{\sqrt{C_{max}}}{\lambda_N \sqrt{N}} \mathbb{E} \left[ \sqrt{N} \|(E_S + H_S) \beta_S^*\|_\infty \right] \mathbb{P}(\mathcal{B}) \\ &= O \left( \frac{1}{\lambda_N} \left( s \sqrt{M_n} n^{-\gamma+1/2} + \sqrt{\frac{s \log(N)}{n}} \right) \right). \end{aligned}$$

Moreover,

$$\begin{aligned} &\mathbb{E} \left[ \left\| \frac{1}{\lambda_N N} (E_S + H_S)^T (E_S + H_S) \beta_S^* \right\|_2 \middle| \mathcal{B} \right] \mathbb{P}(\mathcal{B}) \\ &\leq \frac{\mathbb{P}(\mathcal{B})}{\lambda_N N} \mathbb{E} \left[ \sqrt{s M_n} \|(E_S + H_S)^T (E_S + H_S) \beta_S^*\|_\infty \middle| \mathcal{B} \right] \\ &= O \left( \frac{\sqrt{s M_n}}{\lambda_N} \left( s \sqrt{M_n} n^{-\gamma+1/2} + \sqrt{\frac{s \log(N)}{n}} \right) \right. \\ &\quad \left. (n^{-\gamma+1/2} + n^{-a}) \right). \end{aligned}$$

Thus,

$$\begin{aligned} &\frac{1 - \tilde{\delta}}{\sqrt{s}} \mathbb{E} \left[ \left\| \frac{1}{\lambda_N N} \tilde{A}_S^T (E_S + H_S) \beta_S^* \right\|_2 \middle| \mathcal{B} \right] \mathbb{P}(\mathcal{B}) \\ &= O \left( \frac{1}{\lambda_N} \sqrt{s M_n} n^{-\gamma+1/2} + \frac{1}{\lambda_N} \sqrt{\frac{\log(N)}{n}} \right) \\ &\quad + O \left( \frac{s M_n}{\lambda_N} n^{-2\gamma+1} + \frac{\sqrt{s M_n \log(N)}}{\lambda_N n^\gamma} \right) \\ &\quad + O \left( \frac{s M_n}{\lambda_N n^{\gamma+a-1/2}} + \frac{\sqrt{s M_n \log(N)}}{\lambda_N n^{a+1/2}} \right). \end{aligned}$$

Similarly,

$$\begin{aligned} &\mathbb{E} \left[ \left\| \frac{1}{\lambda_N N} \tilde{A}_j^T (E_S + H_S) \beta_S^* \right\|_2 \middle| \mathcal{B} \right] \mathbb{P}(\mathcal{B}) \\ &\leq \frac{\sqrt{N}}{\lambda_N \sqrt{N}} \left\| \frac{1}{\sqrt{N}} \tilde{A}_j^T \right\|_2 \mathbb{E} \left[ \|(E_S + H_S) \beta_S^*\|_\infty \middle| \mathcal{B} \right] \mathbb{P}(\mathcal{B}) \\ &= O \left( \frac{1}{\lambda_N} \left( s \sqrt{M_n} n^{-\gamma+1/2} + \sqrt{\frac{s \log(N)}{n}} \right) \right), \end{aligned}$$

and,

$$\begin{aligned} &\mathbb{E} \left[ \left\| \frac{1}{\lambda_N N} (E_j + H_j)^T (E_S + H_S) \beta_S^* \right\|_2 \middle| \mathcal{B} \right] \mathbb{P}(\mathcal{B}) \\ &\leq \frac{\sqrt{M_n}}{\lambda_N N} \mathbb{E} \left[ \|(E_j + H_j)^T (E_S + H_S) \beta_S^*\|_\infty \middle| \mathcal{B} \right] \mathbb{P}(\mathcal{B}) \\ &= O \left( \frac{\sqrt{M_n}}{\lambda_N} \left( s \sqrt{M_n} n^{-\gamma+1/2} + \sqrt{\frac{s \log(N)}{n}} \right) \right. \\ &\quad \left. (n^{-\gamma+1/2} + n^{-a}) \right). \end{aligned}$$

Hence,

$$\begin{aligned} &\mathbb{E} \left[ \left\| \frac{1}{\lambda_N N} \tilde{A}_j^T (E_S + H_S) \beta_S^* \right\|_2 \middle| \mathcal{B} \right] \mathbb{P}(\mathcal{B}) \\ &= O \left( \frac{s \sqrt{M_n}}{\lambda_N} n^{-\gamma+1/2} + \frac{1}{\lambda_N} \sqrt{\frac{s \log(N)}{n}} \right) \end{aligned}$$

$$\begin{aligned}
 &+ O\left(\frac{sM_n}{\lambda_N}n^{-2\gamma+1} + \frac{\sqrt{sM_n \log(N)}}{\lambda_N n^\gamma}\right) \\
 &+ O\left(\frac{sM_n}{\lambda_N n^{\gamma+a-1/2}} + \frac{\sqrt{sM_n \log(N)}}{\lambda_N n^{a+1/2}}\right)
 \end{aligned}$$

Also,  $\mathbb{E}\left[\left\|\frac{1}{\lambda_N N}\tilde{A}_S^T V\right\|_2 \middle| \mathcal{B}\right] \mathbb{P}(\mathcal{B})$

$$\begin{aligned}
 &\leq \frac{\sqrt{sM_n}}{\lambda_N} \mathbb{E}\left[\left\|\frac{1}{N}\tilde{A}_S^T V\right\|_\infty \middle| \mathcal{B}\right] \mathbb{P}(\mathcal{B}) \\
 &= O\left(\frac{\sqrt{sM_n}}{\lambda_N} \left(Q + C_Q n^{-\gamma+1/2} + n^{-a}\right) \frac{Qs}{M_n^{2\gamma}}\right) \\
 &= O\left(\frac{s^{3/2}}{\lambda_N M_n^{2\gamma-1/2}} \left(1 + n^{-\gamma+1/2} + n^{-a}\right)\right) \\
 &= O\left(\frac{s^{3/2}}{\lambda_N M_n^{2\gamma-1/2}}\right).
 \end{aligned}$$

So,

$$\frac{1-\tilde{\delta}}{\sqrt{s}} \mathbb{E}\left[\left\|\frac{1}{\lambda_N N}\tilde{A}_S^T V\right\|_2 \middle| \mathcal{B}\right] \mathbb{P}(\mathcal{B}) = O\left(\frac{s}{\lambda_N M_n^{2\gamma-1/2}}\right).$$

Similarly,  $\mathbb{E}\left[\left\|\frac{1}{\lambda_N N}\tilde{A}_j^T V\right\|_2 \middle| \mathcal{B}\right] \mathbb{P}(\mathcal{B})$

$$\begin{aligned}
 &\leq \frac{\sqrt{M_n}}{\lambda_N} \mathbb{E}\left[\left\|\frac{1}{N}\tilde{A}_j^T V\right\|_\infty \middle| \mathcal{B}\right] \mathbb{P}(\mathcal{B}) \\
 &= O\left(\frac{s}{\lambda_N M_n^{2\gamma-1/2}}\right).
 \end{aligned}$$

Thus,

$$\begin{aligned}
 &\frac{2}{\tilde{\delta}} \mathbb{E}\left[\max_{j \in S^c} \|\mu_j^H\|_2 - (1-\tilde{\delta}) \middle| \mathcal{B}\right] \mathbb{P}(\mathcal{B}) \\
 &= O\left(\frac{s\sqrt{M_n}}{\lambda_N} n^{-\gamma+1/2} + \frac{1}{\lambda_N} \sqrt{\frac{s \log(N)}{n}}\right) \\
 &+ O\left(\frac{sM_n}{\lambda_N n^{\gamma+a-1/2}} + \frac{\sqrt{sM_n \log(N)}}{\lambda_N n^{a+1/2}}\right) \\
 &+ O\left(\frac{s}{\lambda_N M_n^{2\gamma-1/2}}\right),
 \end{aligned}$$

where we used that fact that  $\gamma \geq 1$ . Thus, with assumptions (20)-(28),  $\mathbb{P}\left(\max_{j \in S^c} \|\mu_j^H\|_2 \geq 1 - \frac{\tilde{\delta}}{2}\right) \rightarrow 0$   $\square$

**Lemma 11**  $\mathbb{P}\left(\max_{j \in S^c} \|\hat{u}_j - \mu_j^H\|_\infty \geq \frac{\tilde{\delta}}{2\sqrt{M_n}}\right) \rightarrow 0$

Note that

$$\mathbb{P}\left(\max_{j \in S^c} \|\hat{u}_j - \mu_j^H\|_\infty \geq \frac{\tilde{\delta}}{2\sqrt{M_n}}\right)$$

$$\leq \mathbb{P}\left(\max_{j \in S^c} \|\hat{u}_j - \mu_j^H\|_\infty \geq \frac{\tilde{\delta}}{2\sqrt{M_n}} \middle| \mathcal{B}\right) \mathbb{P}(\mathcal{B}) + \mathbb{P}(\mathcal{B}^c),$$

and

$$\begin{aligned}
 &\frac{2\sqrt{M_n}}{\tilde{\delta}} \mathbb{E}\left[\max_{j \in S^c} \|\hat{u}_j - \mu_j^H\|_\infty \middle| \mathcal{B}\right] \\
 &= \frac{2\sqrt{M_n}}{\tilde{\delta}} \mathbb{E}\left[\mathbb{E}\left[\max_{j \in S^c} \|\hat{u}_j - \mu_j^H\|_\infty \middle| \mathcal{B}, H\right] \middle| \mathcal{B}\right].
 \end{aligned}$$

Let

$$\begin{aligned}
 Z_j &\equiv \lambda_N (\hat{u}_j - \mu_j^H) \\
 &= \tilde{A}_j^T (I - \tilde{A}_S (\tilde{A}_S^T \tilde{A}_S)^{-1} \tilde{A}_S^T) \epsilon.
 \end{aligned}$$

Thus, given  $H$ ,  $Z_j$  is a zero mean Gaussian random variable. Furthermore, given  $\mathcal{B}$ ,  $\max_k \text{Var}[Z_{jk}] \leq \sigma_\epsilon^2/N$ .

$$\begin{aligned}
 \mathbb{E}[Z_j^T Z_j] &= \frac{1}{N^2} \tilde{A}_j^T (I - \tilde{A}_S (\tilde{A}_S^T \tilde{A}_S)^{-1} \tilde{A}_S^T) \mathbb{E}[\epsilon \epsilon^T] \\
 &\quad (I - \tilde{A}_S (\tilde{A}_S^T \tilde{A}_S)^{-1} \tilde{A}_S^T) \tilde{A}_j \\
 &= \frac{\sigma^2}{N^2} \tilde{A}_j^T (I - \tilde{A}_S (\tilde{A}_S^T \tilde{A}_S)^{-1} \tilde{A}_S^T) \\
 &\quad (I - \tilde{A}_S (\tilde{A}_S^T \tilde{A}_S)^{-1} \tilde{A}_S^T) \tilde{A}_j \\
 &= \frac{\sigma^2}{N^2} \tilde{A}_j^T \left( I - \tilde{A}_S (\tilde{A}_S^T \tilde{A}_S)^{-1} \tilde{A}_S^T \right. \\
 &\quad \left. - \tilde{A}_S (\tilde{A}_S^T \tilde{A}_S)^{-1} \tilde{A}_S^T \right. \\
 &\quad \left. + \tilde{A}_S (\tilde{A}_S^T \tilde{A}_S)^{-1} \tilde{A}_S^T \tilde{A}_S (\tilde{A}_S^T \tilde{A}_S)^{-1} \tilde{A}_S^T \right) \tilde{A}_j \\
 &= \frac{\sigma^2}{N^2} \tilde{A}_j^T \left( I - \tilde{A}_S (\tilde{A}_S^T \tilde{A}_S)^{-1} \tilde{A}_S^T \right. \\
 &\quad \left. - \tilde{A}_S (\tilde{A}_S^T \tilde{A}_S)^{-1} \tilde{A}_S^T + \tilde{A}_S (\tilde{A}_S^T \tilde{A}_S)^{-1} \tilde{A}_S^T \right) \tilde{A}_j \\
 &= \frac{\sigma^2}{N^2} \tilde{A}_j^T \left( I - \tilde{A}_S (\tilde{A}_S^T \tilde{A}_S)^{-1} \tilde{A}_S^T \right) \tilde{A}_j \\
 &= \frac{\sigma^2}{N} \left( \frac{1}{N} \tilde{A}_j^T \tilde{A}_j - \frac{1}{N} \tilde{A}_j^T \tilde{A}_S (\tilde{A}_S^T \tilde{A}_S)^{-1} \tilde{A}_S^T \tilde{A}_j \right).
 \end{aligned}$$

So, given  $\mathcal{B}$

$$\begin{aligned}
 \text{Var}[Z_{jk}] &= \frac{\sigma^2}{N} \left( \frac{1}{N} e_k^T \tilde{A}_j^T \tilde{A}_j e_k \right) \\
 &\quad - \frac{\sigma^2}{N^2} e_k^T \tilde{A}_j^T \tilde{A}_S (\tilde{A}_S^T \tilde{A}_S)^{-1} \tilde{A}_S^T \tilde{A}_j e_k \\
 &= O\left(\frac{1}{N}\right),
 \end{aligned}$$

where the last line follows from the fact that  $\tilde{A}_j^T \tilde{A}_S (\tilde{A}_S^T \tilde{A}_S)^{-1} \tilde{A}_S^T \tilde{A}_j$  is PSD and  $\|\frac{1}{N} \tilde{A}_j^T \tilde{A}_j\|_{\max} \leq (Q + C_Q n^{-\gamma+1/2} + n^{-a})^2$ .

Hence,

$$\frac{1}{\lambda_N} \mathbb{E}\left[\max_{j \in S^c} \|Z_j\|_\infty \middle| \mathcal{B}, H\right] = O\left(\frac{1}{\lambda_N} \sqrt{\frac{\log((p-s)M_n)}{N}}\right).$$

Hence,

$$\begin{aligned} & \frac{2\sqrt{M_n}}{\tilde{\delta}} \mathbb{E} \left[ \max_{j \in S^c} \|\hat{u}_j - \mu_j^H\|_\infty \right] \\ & \leq O \left( \frac{1}{\lambda_N} \sqrt{M_n \frac{\log((p-s)M_n)}{N}} \right), \end{aligned}$$

and so  $\mathbb{P} \left( \max_{j \in S^c} \|\hat{u}_j - \mu_j^H\|_\infty \geq \frac{\tilde{\delta}}{2\sqrt{M_n}} \right) \rightarrow 0$
